# Supplementary material for: Mosquito Passage Dramatically Changes var Gene Expression in Controlled Human Plasmodium falciparum Infections
Source: PLOS journal article supplement (doi:10.1371/journal.ppat.1005538), 2016-04-12

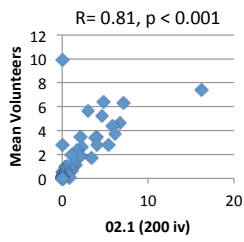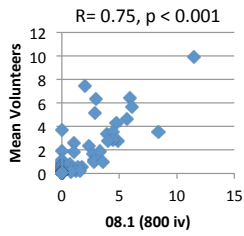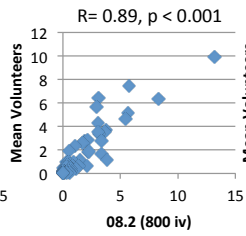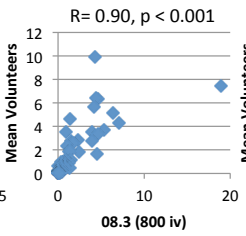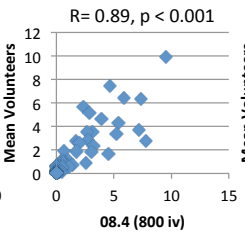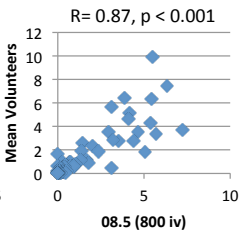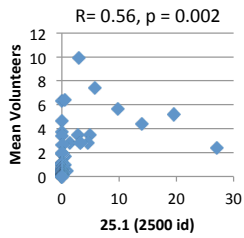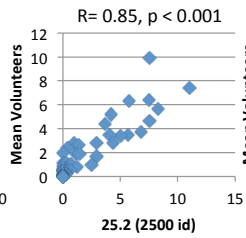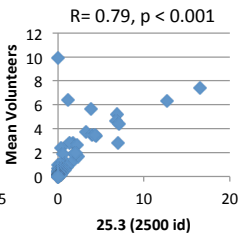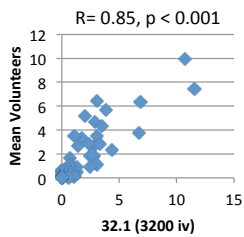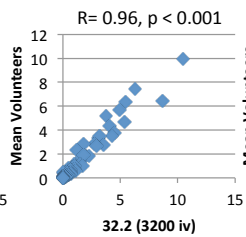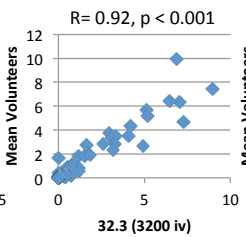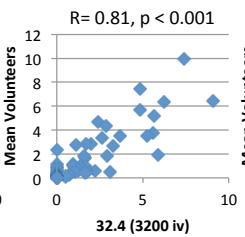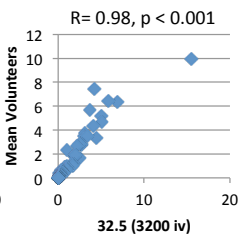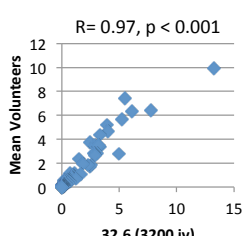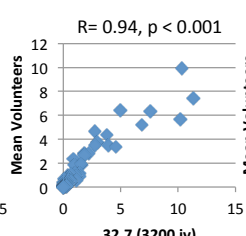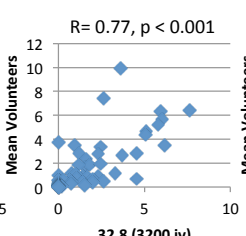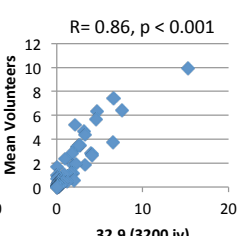

Supplement: S2 (10.1371/journal.ppat.1005538.s002) [file journal.ppat.1005538.s002]
